# Supplementary material
Source: HighWire-hosted journal article supplement (https://www.cmaj.ca/highwire/filestream/58242/field_highwire_adjunct_files/0/gender-kaul-online_appendix_1.pdf)
Supplement: gender-kaul-online_appendix_1.pdf [file gender-kaul-online_appendix_1.pdf]

**Appendix 1: ICD-9-CM (International Classification of Diseases, 9th revision, Clinical Modification) for conditions studied**

| Disease or condition        | ICD-9-CM codes                                       |
|-----------------------------|------------------------------------------------------|
| Acute myocardial infarction | 410.x                                                |
| Cancer                      | 140.0-208.9                                          |
| Cardiac dysrhythmias        | 427.x                                                |
| Cerebrovascular disease     | 430.0-438.x                                          |
| Chest pain                  | 786.5, 786.51, 786.59                                |
| Congestive heart failure    | 428.x                                                |
| Diabetes mellitus           | 250.1-250.9                                          |
| Hypertension                | 401-405                                              |
| Peripheral vascular disease | 440-456                                              |
| Renal disease               | 403.x, 404.x, 584.x, 585.x, 586.x, 788.5, 96.7, v451 |
| Stable angina               | 413.x                                                |
| Unstable angina             | 411.1                                                |
